# Supplementary material
Source: publisher figshare collection journal article supplement (https://tandf.figshare.com/ndownloader/files/15250526)
Supplement: Supplementary file 1 [file 15250526]

## Sheet: Comment
Table S1
Model for split #5
Table S2
Promoters of increase/decrease for pEC3
Table S3
Correlation weights
Table S4
Percentage of identity for splits #1, #2, #3, #4, and #5

## Sheet: Table S1
Set	CAS	SMILES	DCW	Expr	Calc	Expr-Calc	DefectSMILES	Applicability
+	2657-25-2	O=C(/C=C/c1ccccc1)c2ccc(O)cc2	17.4437	2.699	0.5348	2.1642	0.3455	YES
+	1482-74-2	Oc2ccc(C(=O)/C=C/c1ccccc1)c(O)c2O	11.6931	0.959	0.0934	0.8656	2.3393	YES
+	111-12-6	O=C(C#CCCCCC)OC	10.2546	0.347	-0.017	0.364	0.0906	YES
#	1776-30-3	O=C(/C=C/c1ccccc1)c2ccc(O)cc2O	17.152	0.252	0.5124	-0.2604	0.3544	YES
+	2953-00-7	CC(C)Oc1cc(ccc1O)\C=C\C	3.03772	0.222	-0.571	0.793	1.2496	YES
#	1210-39-5	O=C\C=C(/c1ccccc1)c2ccccc2	7.59444	0.222	-0.2212	0.4432	0.3225	YES
*	3775-21-1	CC2=NS(=O)(=O)N=C2c1ccccc1	13.4915	-0.146	0.2314	-0.3774	7.1959	YES
-	13041-12-8	Oc1c(C)cc(cc1OC)\C=C\C	3.54717	-0.204	-0.5319	0.3279	0.2675	YES
-	100-43-6	C=Cc1ccncc1	3.38343	-0.204	-0.5444	0.3404	7.071	YES
#	29043-97-8	O=C1OC(C)(C)CC1=C	10.2232	-0.255	-0.0194	-0.2356	0.0977	YES
+	3913-71-1	CCCCCCC\C=C\C=O	-2.61419	-0.398	-1.0048	0.6068	0.1437	YES
#	111-80-8	O=C(C#CCCCCCC)OC	9.81395	-0.398	-0.0508	-0.3472	0.0951	YES
+	577-71-9	O=[N+]([O-])c1cc(O)ccc1[N+]([O-])=O	24.1687	-0.415	1.051	-1.466	41.2807	No
*	104-55-2	O=C\C=C\c1ccccc1	1.68315	-0.477	-0.6749	0.1979	0.1653	YES
#	142-83-6	C\C=C\C=C\C=O	-0.22204	-0.544	-0.8212	0.2772	0.1679	YES
+	122-57-6	CC(=O)/C=C/c1ccccc1	5.47812	-0.568	-0.3837	-0.1843	1.1659	YES
#	533-75-5	OC1=CC=CC=CC1=O	0.66684	-0.633	-0.753	0.12	0.1062	YES
+	21834-92-4	O=C\C(=C\CC(C)C)c1ccccc1	-4.42532	-0.643	-1.1438	0.5008	0.2116	YES
*	101-39-3	C\C(=C/c1ccccc1)C=O	1.93702	-0.653	-0.6555	0.0025	0.1843	YES
#	6728-26-3	CCC\C=C\C=O	-0.85162	-0.74	-0.8695	0.1295	0.1255	YES
*	141-05-9	O=C(\C=C/C(=O)OCC)OCC	2.46698	-0.763	-0.6148	-0.1482	1.1781	YES
-	116-26-7	CC=1C=CCC(C)(C)C=1C=O	4.52519	-0.875	-0.4568	-0.4182	0.1158	YES
#	2111-75-3	CC(=C)C1CC=C(C=O)CC1	-1.71548	-0.908	-0.9358	0.0278	0.1236	YES
*	NA-1	CC(O)(C=C)CC\C=C(/C)C=O	1.24532	-0.978	-0.7086	-0.2694	0.1949	YES
+	103-11-7	O=C(C=C)OCC(CCCC)CC	-5.64643	-1	-1.2376	0.2376	0.106	YES
#	122-40-7	O=CC(\CCCCC)=C/c1ccccc1	0.20493	-1.041	-0.7884	-0.2526	0.2185	YES
-	7492-44-6	O=CC(\CCCC)=C/c1ccccc1	0.64557	-1.041	-0.7546	-0.2864	0.214	YES
-	101-86-0	O=CC(\CCCCCC)=C/c1ccccc1	-0.23571	-1.041	-0.8222	-0.2188	0.2231	YES
#	141-32-2	C=CC(=O)OCCCC	-0.19755	-1.041	-0.8193	-0.2217	0.077	YES
+	6485-40-1	CC1=CC[C@H](CC1=O)C(C)=C	-3.58093	-1.111	-1.079	-0.032	1.1485	YES
-	103-41-3	O=C(OCc1ccccc1)/C=C/c2ccccc2	4.42815	-1.265	-0.4642	-0.8008	1.2776	YES
-	104-54-1	OC\C=C\c1ccccc1	2.62209	-1.322	-0.6029	-0.7191	0.1507	YES
#	127-51-5	CC1(C)CCC=C(C)C1\C=C(/C)C(C)=O	-8.03459	-1.338	-1.4209	0.0829	0.1942	YES
-	140-88-5	C=CC(=O)OCC	0.68373	-1.447	-0.7517	-0.6953	0.0679	YES
*	97-90-5	O=C(OCCOC(=O)C(=C)C)C(=C)C	-9.13131	-1.447	-1.5051	0.0581	0.1587	YES
+	1565-94-2	C=C(C)C(=O)OCC(O)COc1ccc(cc1)C(C)(C)c2ccc(OCC(O)COC(=O)C(=C)C)cc2	-6.09902	-1.653	-1.2723	-0.3807	1.5128	YES
-	80-62-6	C=C(C)C(=O)OC	-1.28076	-1.954	-0.9025	-1.0515	0.073	YES
-	20048-27-5	Nc1ccc(cc1)/N=C3/C=C(N)C(=N\c2ccc(N)cc2)/C=C3N	30.4417	1.398	1.5325	-0.1345	7.3999	YES
-	99-56-9	Nc1ccc(cc1N)[N+]([O-])=O	25.7272	1.301	1.1706	0.1304	21.2104	No
+	65235-31-6	O=[N+]([O-])c1cc(O)ccc1NCCO	13.7967	1.155	0.2549	0.9001	23.2297	No
-	123-31-9	Oc1ccc(O)cc1	6.32439	0.959	-0.3187	1.2777	0.1339	YES
-	106-50-3	Nc1ccc(N)cc1	13.3826	0.796	0.2231	0.5729	0.1177	YES
+	95-70-5	Nc1ccc(N)c(C)c1	11.4388	0.699	0.0739	0.6251	0.1334	YES
+	610-81-1	O=[N+]([O-])c1cc(O)ccc1N	15.6401	0.699	0.3964	0.3026	22.2127	No
-	95-55-6	Nc1ccccc1O	6.26583	0.398	-0.3232	0.7212	1.115	YES
+	55302-96-0	Cc1ccc(NCCO)cc1O	10.0471	0.398	-0.0329	0.4309	1.1516	YES
+	5307-14-2	O=[N+]([O-])c1cc(N)ccc1N	23.5166	0.398	1.001	-0.603	22.1956	No
#	108-45-2	Nc1cccc(N)c1	13.9381	0.31	0.2657	0.0443	0.1124	YES
+	55658-55-4	CC1=CC[C@H](C/C1=N\O)C(C)=C	10.0596	0.222	-0.032	0.254	9.1708	No
-	10897-60-1	Oc1ccc(CCO)cc1O	1.84642	0.222	-0.6624	0.8844	0.1553	YES
+	35691-65-7	N#CCCC(Br)(CBr)C#N	16.8471	0.046	0.489	-0.443	14.0773	No
-	90-15-3	Oc2cccc1ccccc12	1.86976	-0.114	-0.6606	0.5466	1.1807	YES
+	2835-99-6	Cc1cc(O)ccc1N	9.3666	-0.161	-0.0852	-0.0758	3.1347	YES
-	2871-01-4	[O-][N+](=O)c1cc(N)ccc1NCCO	19.0363	-0.342	0.6571	-0.9991	17.2106	No
-	591-27-5	Nc1cccc(O)c1	10.7916	-0.505	0.0242	-0.5292	1.1402	YES
+	154750-20-6	BrCC1CC(C)(C)OC1=O	-2.32686	-0.556	-0.9828	0.4268	1.1042	YES
-	93-51-6	Oc1ccc(C)cc1OC	1.8789	-0.763	-0.6599	-0.1031	0.1414	YES
*	105-13-5	COc1ccc(CO)cc1	2.27697	-0.771	-0.6294	-0.1416	0.1441	YES
+	2785-87-7	Oc1ccc(cc1OC)CCC	2.09187	-0.833	-0.6436	-0.1894	0.1491	YES
-	29705-39-3	O=[N+]([O-])c1cc(ccc1N)N(CCO)CCO	17.8895	-0.914	0.569	-1.483	22.2396	No
+	97-53-0	Oc1ccc(cc1OC)CC=C	2.90525	-1.114	-0.5811	-0.5329	0.1653	YES
+	186743-25-9	Oc1cc(C)c(cc1OC)CC=C	0.40601	-1.114	-0.773	-0.341	0.1864	YES
-	186743-24-8	Oc1c(C)cc(cc1OC)CC=C	2.34793	-1.23	-0.6239	-0.6061	0.189	YES
+	140-67-0	COc1ccc(CC=C)cc1	-0.3009	-1.255	-0.8272	-0.4278	0.1584	YES
+	186743-26-0	COc1c(C)c(ccc1O)CC=C	1.03719	-1.505	-0.7245	-0.7805	0.18	YES
-	111-30-8	O=CCCCC=O	-1.34418	1	-0.9073	1.9073	0.0626	YES
-	57074-21-2	Clc1c(C)cc(O)c(C=O)c1O	7.77534	0.398	-0.2073	0.6053	3.1948	YES
-	50-00-0	C=O	0.86474	0.215	-0.7378	0.9528	0.0296	YES
-	579-07-7	O=C(C(C)=O)c1ccccc1	-1.41717	-0.114	-0.9129	0.7989	0.1324	YES
+	107-22-2	O=CC=O	-0.02225	-0.146	-0.8059	0.6599	0.0489	YES
#	122-78-1	O=CCc1ccccc1	1.06338	-0.477	-0.7225	0.2455	0.1015	YES
#	93-53-8	CC(C=O)c1ccccc1	0.22281	-0.799	-0.787	-0.012	0.1232	YES
*	112-45-8	C=CCCCCCCCCC=O	-3.12501	-0.833	-1.044	0.211	0.0901	YES
#	167998-73-4	Cc1c(cc(C)c(C)c1C)C(=O)CC(C)=O	-5.51942	-0.919	-1.2278	0.3088	0.1899	YES
-	167998-76-7	CCc1ccc(cc1C(=O)CC(C)=O)CC	-2.21059	-0.982	-0.9738	-0.0082	0.1574	YES
*	465-29-2	CC2(C)C1CCC2(C)C(=O)C1=O	-4.06634	-1	-1.1163	0.1163	2.1151	YES
#	110-41-8	CC(CCCCCCCCC)C=O	-6.75042	-1	-1.3223	0.3223	0.0834	YES
*	55846-68-1	O=C(CC(=O)CCCCC)c1ccccc1	-4.22384	-1.041	-1.1284	0.0874	0.1503	YES
+	502-67-0	C/C(C)=C\CCC(\C)=C\CCC(\C)=C\C=O	-2.40513	-1.079	-0.9888	-0.0902	1.3226	YES
#	5392-40-5	C\C(C)=C\CCC(\C)=C\C=O	-5.05732	-1.114	-1.1923	0.0783	0.2327	YES
*	56290-55-2	Cc1ccc(C)cc1C(=O)CC(C)=O	-3.77277	-1.114	-1.0937	-0.0203	0.1538	YES
+	5406-12-2	Cc1ccc(CCC=O)cc1	-0.35481	-1.146	-0.8314	-0.3146	0.1382	YES
-	31906-04-4	O=CC1CC=C(CCCC(C)(C)O)CC1	-1.85812	-1.23	-0.9468	-0.2832	0.141	YES
#	80-54-6	CC(C)(C)c1ccc(CC(C)C=O)cc1	-7.33627	-1.279	-1.3673	0.0883	0.1772	YES
+	613-29-6	CCCCN(CCCC)c1ccccc1	3.59894	-1.292	-0.5279	-0.7641	0.1362	YES
-	326-06-7	O=C(CC(=O)C(F)(F)F)c1ccccc1	-1.04962	-1.301	-0.8847	-0.4163	0.1293	YES
-	2277-19-2	CC\C=C\CCCCC=O	-2.76877	-1.362	-1.0167	-0.3453	0.139	YES
*	13706-86-0	CC(=O)C(=O)CC(C)C	-6.14482	-1.415	-1.2758	-0.1392	0.0711	YES
-	1118-71-4	CC(C)(C)C(=O)CC(=O)C(C)(C)C	-13.7384	-1.431	-1.8587	0.4277	0.1028	YES
-	6668-24-2	O=C(C(C)C(C)=O)c1ccccc1	-5.07638	-1.462	-1.1938	-0.2682	0.1471	YES
-	170928-69-5	Cc1c(cc(C)c(C)c1C)C(=O)CC(=O)OCC	-4.31143	-1.519	-1.1351	-0.3839	0.215	YES
#	107-75-5	O=CCC(C)CCCC(C)(C)O	-8.85188	-1.519	-1.4836	-0.0354	0.0882	YES
-	97-96-1	CCC(CC)C=O	-4.10657	-1.881	-1.1194	-0.7616	0.0561	YES
#	109-55-7	NCCCN(C)C	4.08939	-0.342	-0.4902	0.1482	0.0532	YES
*	107-15-3	NCCN	5.97874	-0.342	-0.3452	0.0032	0.036	YES
+	111-40-0	NCCNCCN	9.33303	-0.763	-0.0878	-0.6752	1.0613	YES
+	89-25-8	O=C2CC(C)=NN2c1ccccc1	1.41909	-0.929	-0.6952	-0.2338	8.1628	YES
#	106-24-1	C\C(C)=C\CCC(\C)=C\CO	-4.11839	-1.415	-1.1203	-0.2947	0.2181	YES
-	1086-00-6	ClCc4ccc1ccc2cccc3ccc4c1c23	39.0943	2.301	2.1967	0.1043	19.2108	No
-	26172-55-4	ClC1=CC(=O)N(C)S1	7.41951	2.046	-0.2346	2.2806	0.0972	YES
+	70-25-7	N=C(N[N+](=O)[O-])N(C)N=O	28.2324	1.523	1.3629	0.1601	23.1813	No
-	684-93-5	NC(=O)N(C)N=O	11.9878	1.301	0.116	1.185	0.1018	YES
-	57-57-8	O=C1CCO1	8.64495	0.824	-0.1406	0.9646	0.0567	YES
+	100-39-0	BrCc1ccccc1	3.67252	0.699	-0.5222	1.2212	1.0951	YES
+	2374-65-4	O=S(=O)(CCCCCCCCCCCC)OC	2.11161	0.409	-0.6421	1.0511	3.123	YES
+	55406-53-6	O=C(NCCCC)OCC#CI	9.73492	0.046	-0.0569	0.1029	4.0965	YES
#	759-73-9	NC(=O)N(CC)N=O	11.1679	-0.041	0.0531	-0.0941	0.1036	YES
+	1675-54-3	CC(C)(c2ccc(OCC1CO1)cc2)c4ccc(OCC3CO3)cc4	11.2002	-0.176	0.0556	-0.2316	22.3176	No
#	2634-33-5	O=C2NSc1ccccc12	3.58199	-0.362	-0.5292	0.1672	0.1807	YES
+	112-82-3	BrCCCCCCCCCCCCCCCC	-2.6674	-0.362	-1.0089	0.6469	0.1033	YES
-	118-58-1	Oc2ccccc2C(=O)OCc1ccccc1	-1.9112	-0.462	-0.9508	0.4888	3.2258	YES
+	64-67-5	O=S(=O)(OCC)OCC	7.71361	-0.519	-0.2121	-0.3069	3.1046	YES
-	3508-00-7	BrCCCCCCCCCCCCCCCCC	-3.10804	-0.681	-1.0427	0.3617	0.1078	YES
+	629-72-1	BrCCCCCCCCCCCCCCC	-2.22676	-0.708	-0.9751	0.2671	0.0987	YES
-	137-26-8	CN(C)C(=S)SSC(=S)N(C)C	14.0261	-0.716	0.2725	-0.9885	4.0879	YES
+	4276-49-7	BrCCCCCCCCCCCCCCCCCCCC	-4.42996	-0.785	-1.1442	0.3592	0.1215	YES
*	103-63-9	BrCCc1ccccc1	3.99998	-0.792	-0.4971	-0.2949	0.1038	YES
+	66-27-3	CS(=O)(=O)OC	3.66796	-0.908	-0.5226	-0.3854	0.0865	YES
*	6938-66-5	BrCCCCCCCCCCCCCCCCCCCCCC	-5.31125	-0.919	-1.2118	0.2928	0.1306	YES
#	51323-71-8	CS(=O)(=O)OCCCCCCCCCCCC	-1.3651	-0.944	-0.9089	-0.0351	0.1374	YES
#	4860-03-1	CCCCCCCCCCCCCCCCCl	0.05996	-0.959	-0.7995	-0.1595	0.0896	YES
*	112-71-0	BrCCCCCCCCCCCCCC	-1.78611	-0.964	-0.9412	-0.0228	0.0942	YES
#	111-25-1	BrCCCCCC	1.73902	-1	-0.6707	-0.3293	0.0578	YES
*	765-09-3	BrCCCCCCCCCCCCC	-1.34547	-1	-0.9074	-0.0926	0.0896	YES
*	4292-19-7	CCCCCCCCCCCCI	-3.07695	-1.114	-1.0403	-0.0737	4.0544	YES
-	3386-33-2	CCCCCCCCCCCCCCCCCCCl	-0.82132	-1.204	-0.8672	-0.3368	0.0987	YES
+	120-51-4	O=C(OCc1ccccc1)c2ccccc2	5.6211	-1.23	-0.3727	-0.8573	1.2323	YES
+	73367-80-3	O=C(O)CCCCCCCCCCCBr	-1.83947	-1.255	-0.9453	-0.3097	1.1197	YES
+	544-77-4	CCCCCCCCCCCCCCCCI	-4.83951	-1.279	-1.1756	-0.1034	4.0726	YES
-	693-67-4	BrCCCCCCCCCCC	-0.46419	-1.301	-0.8398	-0.4612	0.0805	YES
-	2425-54-9	CCCCCCCCCCCCCCCl	0.94124	-1.301	-0.7319	-0.5691	0.0805	YES
-	74036-97-8	CCCCCCCC(Br)CCCCCC	-4.92438	-1.322	-1.1821	-0.1399	5.0754	YES
+	35709-09-2	CS(=O)(=O)OCCCCCCCC\C=C\CCCCCCCC	-4.25821	-1.398	-1.131	-0.267	0.2344	YES
-	2426-08-6	CCCCOCC1CO1	2.1084	-1.491	-0.6423	-0.8487	0.0749	YES
-	50-32-8	c1cc2c3ccc4cccc5ccc(cc2cc1)c3c45	39.0623	3.046	2.1942	0.8518	24.2657	No
-	57-97-6	Cc2c1c4ccccc4ccc1c(C)c3ccccc23	37.3866	2.222	2.0656	0.1564	20.2281	No
+	15646-46-5	O=C1OC(=N/C1=C\OCC)c2ccccc2	21.8858	2.523	0.8758	1.6472	8.2547	YES
+	3326-32-7	Oc4cc5Oc1cc(O)ccc1C3(OC(=O)c2cc(\N=C=S)ccc23)c5cc4	37.5922	0.854	2.0814	-1.2274	42.4068	No
+	525-76-8	CC2=Nc1ccccc1C(=O)O2	10.5311	0.155	0.0042	0.1508	6.1618	YES
+	176665-02-4	CC1(C)N=C(CCCCCC)OC1=O	0.41098	-0.114	-0.7726	0.6586	1.1358	YES
*	149-30-4	Sc1nc2ccccc2s1	8.99333	-0.23	-0.1138	-0.1162	5.1153	YES
-	176664-99-6	CC1(C)N=C(CCCC)OC1=O	1.29226	-0.255	-0.705	0.45	1.1267	YES
+	764-85-2	ClC(=O)CCCCCCCC	-1.65998	-0.255	-0.9316	0.6766	2.0763	YES
-	NA-2	OS(=O)(=O)c1ccccc1OC(=O)C(C)CCCCCCCCCCCCCCCC	-6.48215	-0.301	-1.3017	1.0007	1.2601	YES
-	36727-29-4	CC(CC(C)(C)C)CC(Cl)=O	-7.44697	-0.431	-1.3758	0.9448	4.0701	YES
+	176665-04-6	CC1(C)N=C(CCCCCCCCC)OC1=O	-0.91094	-0.447	-0.8741	0.4271	1.1495	YES
+	17369-59-4	CC\C=C1/OC(=O)c2ccccc12	6.16683	-0.568	-0.3308	-0.2372	5.2191	YES
-	119-84-6	O=C1CCc2ccccc2O1	12.1861	-0.748	0.1312	-0.8792	0.1475	YES
+	552-30-7	O=C(O)c1ccc2C(=O)OC(=O)c2c1	8.92737	-0.964	-0.1189	-0.8451	3.2307	YES
+	176665-06-8	CC1(C)N=C(CCCCCCCCCCC)OC1=O	-1.79223	-1.204	-0.9417	-0.2623	1.1586	YES
*	176665-09-1	CC1(C)N=C(CCCCCCCCCCCCCCC)OC1=O	-3.5548	-1.255	-1.077	-0.178	1.1768	YES
-	176665-11-5	CC1(C)N=C(CCCCCCCCCCCCCCCCC)OC1=O	-4.43608	-1.279	-1.1447	-0.1343	1.1859	YES
-	93-99-2	O=C(Oc1ccccc1)c2ccccc2	7.54013	-1.301	-0.2254	-1.0756	1.2396	YES
+	39236-46-9	O=C2NC(NC(=O)NCNC(=O)NC1NC(=O)N(CO)C1=O)C(=O)N2CO	-0.24381	-1.38	-0.8229	-0.5571	11.3654	No
#	61-33-6	OC(=O)C2N3C(=O)C(NC(=O)Cc1ccccc1)C3SC2(C)C	-10.6383	-1.477	-1.6207	0.1437	0.2816	YES
+	4638-48-6	Oc2ccc(Cl)cc2C(=O)Nc1ccccc1	5.08395	-0.699	-0.4139	-0.2851	9.2471	No
-	99-83-2	CC=1C=CC(CC=1)C(C)C	-0.00784	-0.732	-0.8047	0.0727	0.1026	YES
#	NA-3	CC1=CC[C@H](CC1=C)C(C)=C	-1.43806	-0.863	-0.9145	0.0515	0.1445	YES
#	2136-71-2	OCCOCCCCCCCCCCCCCCCC	-6.72232	-0.944	-1.3201	0.3761	0.1049	YES
#	99-86-5	CC(C)C1=CC=C(C)CC1	-3.2818	-0.949	-1.0561	0.1071	0.1015	YES
+	32388-55-9	CC(=O)C=1C[C@]23C[C@@H](C=1C)C(C)(C)[C@@H]3CC[C@H]2C	-7.50764	-1.143	-1.3804	0.2374	30.2911	No
-	514-10-3	CC(C)C=3CC[C@H]1C(=CC[C@H]2[C@@](C)(CCC[C@]12C)C(=O)O)C=3	-12.2751	-1.176	-1.7464	0.5704	12.3307	No
+	78-70-6	CC(O)(C=C)CC\C=C(\C)C	0.69083	-1.477	-0.7511	-0.7259	0.1952	YES
+	5989-27-5	CC1=CCC(CC1)C(C)=C	-1.84333	-1.839	-0.9456	-0.8934	0.0941	YES
-	1897-45-6	Clc1c(C#N)c(Cl)c(C#N)c(Cl)c1Cl	32.7305	2.398	1.7082	0.6898	18.162	No
+	97-00-7	O=[N+]([O-])c1cc(ccc1Cl)[N+]([O-])=O	22.9721	1.301	0.9592	0.3418	44.2707	No
+	108-77-0	Clc1nc(Cl)nc(Cl)n1	16.1834	1.046	0.4381	0.6079	27.0563	No
-	87-86-5	Clc1c(O)c(Cl)c(Cl)c(Cl)c1Cl	15.058	-1.301	0.3517	-1.6527	19.1595	No
+	23593-75-1	Clc1ccccc1C(c2ccccc2)(c3ccccc3)n4ccnc4	12.7655	-0.681	0.1757	-0.8567	32.2797	No
+	106-22-9	C\C(C)=C\CCC(C)CCO	-7.48727	-1.638	-1.3789	-0.2591	0.1364	YES
-	106-51-4	O=C1C=CC(=O)C=C1	16.9478	2.004	0.4968	1.5072	0.0889	YES
+	62-53-3	Nc1ccccc1	4.92042	-1.949	-0.4265	-1.5225	0.0984	YES
*	555-10-2	C=C1C=CC(CC1)C(C)C	8.30786	-0.748	-0.1664	-0.5816	0.0946	YES
*	NA-4	CC1(C)N=C(CCCCCCCCCCCCCCCCCCC)OC1=O	-5.31736	-1.415	-1.2123	-0.2027	1.195	YES
*	112-67-4	ClC(=O)CCCCCCCCCCCCCCC	-4.74447	-0.944	-1.1683	0.2243	2.1081	YES
-	57077-36-8	ClC(=O)CCCCCC(C)C	-5.07393	-0.431	-1.1936	0.7626	2.0815	YES
-	1154-59-2	Clc2ccc(NC(=O)c1cc(Cl)cc(Cl)c1O)cc2Cl	18.4532	1.398	0.6123	0.7857	12.3217	No
+	4282-42-2	CCCCCCCCCI	-1.75502	-1.38	-0.9389	-0.4411	4.0407	YES
+	143-15-7	BrCCCCCCCCCCCC	-0.90483	-1.255	-0.8736	-0.3814	0.0851	YES
*	19218-94-1	CCCCCCCCCCCCCCI	-3.95823	-1.146	-1.108	-0.038	4.0635	YES
*	112-89-0	BrCCCCCCCCCCCCCCCCCC	-3.54868	-1.176	-1.0765	-0.0995	0.1124	YES
*	3344-77-2	BrCCCCCCCCCCCCO	-3.61304	-0.839	-1.0815	0.2425	0.0909	YES
-	10520-81-7	O=C(O)C(Br)CCCCCCCCCCCC	-5.47978	-0.531	-1.2248	0.6938	6.1127	YES
+	2682-20-4	O=C1C=CSN1C	14.4291	-0.279	0.3034	-0.5824	5.0788	YES
+	100-11-8	O=[N+]([O-])c1ccc(CBr)cc1	14.3315	1.301	0.2959	1.0051	25.2011	No
-	77-78-1	O=S(=O)(OC)OC	9.68597	0.721	-0.0607	0.7817	3.0986	YES
+	620159-84-4	CCC(C)(C)C1CCC(CC1)CC=O	-8.71575	-1.568	-1.4732	-0.0948	0.1158	YES
+	1205-17-0	O=CC(C)Cc1ccc2OCOc2c1	0.44621	-1.215	-0.7699	-0.4451	4.1804	YES
-	35578-47-3	O=C(c1ccc(Br)cc1)C(=O)c2ccc(Br)cc2	-2.49567	-1.312	-0.9957	-0.3163	11.2888	No
+	103-95-7	CC(C)c1ccc(CC(C)C=O)cc1	-5.3691	-1.342	-1.2163	-0.1257	0.1687	YES
*	431-03-8	CC(=O)C(C)=O	-2.3986	-1.041	-0.9883	-0.0527	0.0514	YES
-	600-22-6	CC(=O)C(=O)OC	-0.56396	-0.38	-0.8474	0.4674	0.0712	YES
-	97-54-1	Oc1ccc(cc1OC)\C=C\C	4.1045	-0.079	-0.4891	0.4101	0.2438	YES
+	818-61-1	C=CC(=O)OCCO	-0.15362	-0.146	-0.8159	0.6699	0.0793	YES
*	104-46-1	COc1ccc(/C=C/C)cc1	8.18832	-0.362	-0.1756	-0.1864	1.1773	YES
-	2050-14-8	Oc2ccccc2/N=N/c1ccccc1O	6.33373	-1.446	-0.318	-1.128	5.2534	YES
+	526-37-4	O=Cc1c(cc(C)cc1O)O	4.2916	0.222	-0.4747	0.6967	1.1618	YES
-	6358-09-4	Nc1cc(cc(Cl)c1O)[N+]([O-])=O	14.3002	-0.836	0.2935	-1.1295	25.2334	No
+	2835-95-2	Nc1cc(O)c(C)cc1	7.73685	-0.531	-0.2103	-0.3207	1.1666	YES
-	1166-52-5	Oc1cc(cc(O)c1O)C(=O)OCCCCCCCCCCCC	3.29185	0.523	-0.5515	1.0745	1.2589	YES
#	186743-29-3	COc1c(C)c(ccc1O)\C=C\C	3.31317	-0.556	-0.5498	-0.0062	0.2533	YES
-	96-33-3	C=CC(=O)OC	1.31038	-1.301	-0.7036	-0.5974	0.0625	YES
*	5910-85-0	CC\C=C/C=C\C=O	6.62334	-0.602	-0.2957	-0.3063	1.1479	YES
-	104-27-8	COc1ccc(/C=C/C(=O)CC)cc1	6.27748	-0.968	-0.3223	-0.6457	1.1936	YES

## Sheet: Table S2
No.	SAk	CWs Probe 1	CWs Probe 2	CWs Probe 3	NSs	NSc	NSv	Defect[SAk]
1	=...........	0.05891	0.13544	1.36796	55	53	21	0.0004
2	O...=.......	0.18167	1.17313	0.37937	45	44	17	0.0005
3	C...C...C...	0.30103	0.15892	0.16086	26	17	15	0.0039
4	O...=...C...	2.20496	0.26446	0.05107	25	20	7	0.0032
5	N...........	2.13261	0.31865	0.17149	23	21	3	0.0081
6	c...c...2...	0.18787	0.19463	2.31244	16	8	0	1
7	Omax.0......	0.31085	2.34613	0.37171	15	17	8	0.0031
8	C...C...=...	1.06065	2.00449	0.75695	13	12	7	0.0032
9	C.../.......	0.48682	0.39225	0.3327	11	4	2	0.0063
10	Nmax.1......	0.10001	1.48432	0.78532	11	8	3	0.0034
11	N...=.......	1.40896	3.58017	0.24833	10	3	2	0.0057
12	=...C.../...	0.31575	0.30674	0.41028	9	4	1	0.0089
13	N...(...C...	0.23275	0.13946	2.06158	9	6	2	0.0049
14	O...1.......	1.80246	1.33225	1.33236	9	13	2	0.0049
15	(...O...(...	2.99372	2.2568	2.14552	8	8	4	0.0024
1	C...C...(...	-0.67998	-1.16967	-0.67548	36	25	15	0.0005
2	$10001000000	-0.38779	-1.91423	-0.5901	32	27	12	0.0006
3	c...1...c...	-0.53597	-0.39457	-0.48568	32	42	7	0.0051
4	C...(...=...	-0.17019	-0.71982	-0.79047	24	20	11	0.0014
5	=...O...(...	-0.06837	-0.97166	-0.9927	23	21	9	0.0001
6	O...=...(...	-0.98554	-0.48907	-0.56022	21	23	7	0.0017
7	O...(...C...	-0.95533	-0.87482	-0.86012	20	17	10	0.0024
8	c...O.......	-1.75772	-3.68258	-1.00056	12	9	1	0.01
9	C...C...1...	-1.58609	-0.53483	-1.26422	9	7	5	0.0035
10	c.../.......	-1.30483	-1.40162	-1.59904	6	3	1	0.0068
11	C...=...(...	-0.18101	-0.94305	-0.52966	5	3	6	0.0126
12	C...c...1...	-0.30316	-1.49355	-0.99583	4	7	2	0.0024
13	O...c...2...	-0.99754	-2.88205	-2.16694	4	1	0	1
14	2...(.......	-0.70042	-0.68653	-0.67467	3	2	0	1
15	\...(...C...	-0.70092	-0.79274	-1.06684	3	3	3	0.0104

## Sheet: Table S3
SAk	CW(SAk)	Frequency in training set	Frequency in invisible training set	Frequency in calibration set	DEFECT[SAk]
#...........	1.94018	1	4	0	1
$00000000000	0	0	2	0	0
$00000000001	0.22832	1	0	1	0.0104
$00000000010	0.37909	5	4	4	0.0077
$00000000100	2.05834	1	3	1	0.0104
$00001000000	-1.13794	3	3	1	0.0017
$00001000100	0	0	1	0	0
$00010000000	2.40459	5	3	0	1
$00011000000	-0.69546	2	2	1	0.0024
$01010000010	2.18098	1	0	0	1
$01010000100	0	0	1	0	0
$10000000000	0.41878	1	3	1	0.0104
$10001000000	0.17677	32	27	12	0.0006
$10001000010	0.08985	4	0	0	1
$10001000100	0.2031	1	2	1	0.0104
$10001001000	0	0	1	0	0
$10001100000	0.35942	2	3	1	0.0024
$10010000000	0.24318	1	0	0	1
$10010100000	0	0	1	0	0
$10011000000	2.11017	10	7	2	0.0057
$10011000010	0	0	1	0	0
$10011000100	-0.34883	1	3	0	1
$10011100000	0.31933	1	2	0	1
$10011100100	2.4776	1	0	0	1
$10100000000	0	0	0	1	0
$10101000000	0	0	0	3	0
$10111000000	2.26006	1	0	0	1
$11001000000	0	0	2	0	0
$11011000001	0	0	1	0	0
(...(.......	0.266	8	9	4	0.0024
(...........	0.49306	57	58	19	0.0017
(...C...#...	3.20649	1	3	0	1
(...C...(...	0.13312	25	25	13	0.0028
(...F...(...	0	0	1	0	0
(...Br..(...	0.45611	4	0	0	1
(...Cl..(...	-0.69413	1	6	0	1
(...N...#...	0	0	1	0	0
(...N...(...	0.08038	6	7	0	1
(...O...(...	2.38858	8	8	4	0.0024
(...c...(...	2.2145	2	6	1	0.0024
+...........	-0.95793	2	8	0	1
+...[...(...	-0.61911	2	8	0	1
-...........	0.23942	2	8	0	1
-...[...(...	-0.49172	1	8	0	1
/...(.......	-0.04144	6	2	0	1
/...........	2.33701	12	5	2	0.0068
/...C...(...	0.10705	3	1	1	0.0017
1...(.......	0.20434	12	5	4	0.0017
1...(.../...	0.2645	2	0	0	1
1...........	0.09059	46	52	15	0.0019
1.../.......	0	0	1	0	0
1...C...(...	-0.72565	3	4	3	0.0104
1...C.../...	0.11543	2	0	0	1
1...Cl..(...	0	0	1	0	0
1...N...(...	0.1511	1	1	0	1
1...O...(...	0.00756	2	4	0	1
1...S...(...	2.25451	1	0	0	1
1...c...(...	0.3378	10	21	2	0.0057
1...c.../...	0.83479	5	3	1	0.0057
1...n...(...	0	0	1	0	0
2...(...(...	0	0	1	0	0
2...(.......	0.19554	3	2	0	1
2...(.../...	0.29355	1	0	0	1
2...........	0.17478	19	10	2	0.0091
2.../.......	-0.97769	1	0	0	1
2...1.......	0.22104	1	1	1	0.0104
2...3...(...	0.46858	1	0	0	1
2...C...(...	-1.74504	2	1	1	0.0024
2...N...(...	0.21482	1	0	0	1
2...O...(...	0	0	1	0	0
2...O...1...	0.15726	1	0	0	1
2...c...(...	0.21308	9	4	0	1
2...c.../...	-0.79102	1	0	0	1
2...c...1...	2.38311	3	2	0	1
3...(.......	0.07662	2	1	0	1
3...........	0.4746	3	5	2	0.0056
3.../.......	0.1366	1	0	0	1
3...2.......	0.36117	1	2	1	0.0104
3...C...(...	0	0	1	0	0
3...C...1...	-0.29813	1	0	0	1
3...N...2...	0	0	1	0	0
3...c...(...	0	0	3	0	0
3...c...2...	0	0	1	0	0
4...........	0.13666	2	4	0	1
4...c...(...	0.1145	1	0	0	1
4...c...1...	0	0	2	0	0
4...c...3...	0	0	1	0	0
4...n...(...	0	0	1	0	0
5...........	0.10094	1	1	0	1
5...4.......	0	0	1	0	0
5...c...(...	0.17831	1	0	0	1
=...(...(...	0	0	3	0	0
=...(.......	-0.44975	28	27	12	0.0008
=...........	0.35187	55	53	21	0.0004
=...1...(...	0	0	0	1	0
=...1.......	0.3406	11	2	7	0.005
=...2.......	0	0	1	0	0
=...3.......	0	0	0	1	0
=...C...(...	-0.00095	21	14	9	0.0008
=...C.../...	0.2126	9	4	1	0.0089
=...C...1...	1.43509	4	5	1	0.0041
=...C...2...	0.43499	2	0	0	1
=...C...3...	0.17248	1	0	0	1
=...C...=...	0.28447	1	0	0	1
=...N...(...	0.43574	4	2	2	0.0024
=...N.../...	-0.74874	3	0	0	1
=...O...(...	-0.99393	23	21	9	0.0001
=...S...(...	2.17581	3	1	1	0.0017
@...........	-0.825	1	0	4	0.0248
@...[...1...	0	0	0	1	0
@...[...2...	0	0	0	1	0
@@..........	0	0	0	2	0
@@..[...(...	0	0	0	1	0
C...#.......	2.52871	1	4	0	1
C...#...C...	0	0	3	0	0
C...(...(...	0.11409	7	4	3	0.0008
C...(.......	-0.94384	54	44	18	0.0017
C...(.../...	-0.19227	2	0	0	1
C...(...1...	0.03321	6	2	4	0.0056
C...(...2...	2.07923	1	1	0	1
C...(...=...	0.05412	24	20	11	0.0014
C...(...C...	-0.58964	21	21	13	0.0047
C...........	-0.64092	68	61	29	0.0007
C.../...(...	2.49186	6	2	0	1
C.../.......	0.25561	11	4	2	0.0063
C.../...3...	0.09342	1	0	0	1
C.../...C...	0.01728	4	1	1	0.0041
C...1...(...	0.42047	4	1	2	0.0024
C...1.......	0.23454	16	11	9	0.0036
C...1.../...	0	0	1	0	0
C...1...=...	-0.04442	11	2	7	0.005
C...1...C...	0.11009	5	6	0	1
C...2...(...	0.39963	1	1	0	1
C...2.......	0.18093	5	2	2	0.0001
C...2...1...	0	0	0	1	0
C...2...=...	0	0	1	0	0
C...2...C...	0.37435	1	0	0	1
C...3...(...	0.08929	1	0	0	1
C...3.......	-0.07685	3	1	2	0.0056
C...3.../...	0.51459	1	0	0	1
C...3...2...	0	0	0	1	0
C...3...=...	0	0	0	1	0
C...3...C...	2.074	1	0	0	1
C...=...(...	0.21678	5	3	6	0.0126
C...=.......	0.36503	44	34	18	0.0003
C...=...1...	0.40721	5	2	5	0.0104
C...=...3...	0	0	0	1	0
C...=...C...	-0.0604	19	18	7	0.0007
C...@.......	0.2905	1	0	4	0.0248
C...@@......	0	0	0	2	0
C...C...#...	0.22589	1	3	0	1
C...C...(...	0.39899	36	25	15	0.0005
C...C.......	0.30308	53	38	24	0.0013
C...C...1...	0.12982	9	7	5	0.0035
C...C...2...	0.32002	2	1	0	1
C...C...3...	0.30514	1	0	2	0.0184
C...C...=...	0.41402	13	12	7	0.0032
C...C...C...	-0.01117	26	17	15	0.0039
C...Br..(...	2.47147	1	1	0	1
C...N...(...	2.34079	3	5	0	1
C...N...1...	1.38273	2	1	0	1
C...N...2...	-0.10021	1	0	0	1
C...N...C...	-0.13141	2	0	0	1
C...O...(...	0.21835	17	13	4	0.0045
C...O.../...	0	0	1	0	0
C...O...1...	0.26624	4	7	1	0.0041
C...O...2...	-0.08866	1	0	0	1
C...O...3...	0.62973	1	0	0	1
C...O...C...	-0.4995	2	1	0	1
C...S...(...	0	0	2	0	0
C...S...3...	0	0	1	0	0
C...[...(...	0	0	0	1	0
C...[...2...	0	0	0	1	0
C...[...C...	0.41565	1	0	4	0.0248
C...\...(...	-0.42711	4	3	3	0.007
C...\...C...	0.11863	5	5	6	0.0126
C...c...1...	0.14902	4	7	2	0.0024
C...c...2...	0.16334	1	1	0	1
C...c...4...	0	0	1	0	0
F...(...(...	0	0	1	0	0
F...(.......	0	0	1	0	0
F...(...C...	0	0	1	0	0
F...(...F...	0	0	1	0	0
F...........	0	0	1	0	0
H...........	0.49713	1	0	4	0.0248
H...@.......	0.25189	1	0	4	0.0248
H...@...C...	0.44677	1	0	4	0.0248
H...@@......	0	0	0	1	0
H...@@..C...	0	0	0	1	0
H...[...(...	0.13405	1	0	3	0.0224
H...[...1...	0	0	0	1	0
H...[...2...	0	0	0	2	0
H...[...3...	0	0	0	1	0
Br..(...(...	0.0895	1	0	0	1
Br..(.......	0.06177	4	1	0	1
Br..(...C...	0.44556	3	0	0	1
Br..........	0.60644	10	5	4	0.0001
Br..C...(...	0.34469	1	1	0	1
Br..C.......	0.35166	7	5	4	0.0038
Br..C...C...	0.16196	6	3	4	0.0056
I...........	-0.26647	1	1	1	0.0104
I...C...#...	0	0	1	0	0
I...C.......	-0.17505	1	1	1	0.0104
I...C...C...	-0.55952	1	0	1	0.0104
Cl..(.......	-0.48819	1	7	0	1
Cl..(...=...	0	0	1	0	0
Cl..(...C...	0	0	1	0	0
Cl..........	0.21242	4	10	2	0.0024
Cl..1.......	0	0	3	0	0
Cl..2.......	0	0	1	0	0
Cl..C...(...	0.35779	1	1	0	1
Cl..C.......	1.03436	3	2	1	0.0017
Cl..C...1...	0.33596	1	0	0	1
Cl..C...C...	-0.27613	1	0	1	0.0104
Cl..c...1...	0	0	4	1	0
Cl..c...2...	0	0	1	0	0
Cmax.0......	0.1639	27	20	14	0.0028
Cmax.1......	1.09726	27	42	13	0.002
Cmax.2......	-0.12456	16	5	0	1
Cmax.3......	2.10111	1	1	2	0.0184
Cmax.4......	0.09729	1	3	0	1
Cmax.5......	2.21214	1	1	0	1
N...#.......	0.21056	1	1	0	1
N...#...C...	0.01772	1	1	0	1
N...(.......	0.18468	13	12	2	0.0073
N...(...C...	0.16909	9	6	2	0.0049
N...(...N...	0	0	1	0	0
N...+.......	-0.45322	2	8	0	1
N...........	0.27713	23	21	3	0.0081
N.../...(...	0.11439	1	0	0	1
N.../.......	-0.20832	3	0	0	1
N.../...2...	-1.01367	1	0	0	1
N.../...C...	0.26088	1	0	0	1
N...1.......	0.28873	3	4	1	0.0017
N...1...C...	0.19692	1	1	0	1
N...2.......	-0.79961	2	1	0	1
N...2...C...	0.20701	1	1	0	1
N...3.......	-0.01487	1	1	0	1
N...3...C...	0.08652	1	1	0	1
N...=...(...	0.22883	3	0	0	1
N...=.......	0.04521	10	3	2	0.0057
N...=...1...	0.15883	1	0	0	1
N...=...2...	0	0	1	0	0
N...=...C...	1.364	5	1	2	0.0001
N...=...N...	0.33176	1	0	0	1
N...C...(...	-0.0202	2	3	0	1
N...C.......	0.17535	7	7	0	1
N...C...1...	-0.7757	1	0	0	1
N...C...C...	0.04864	5	3	0	1
N...C...N...	0.06027	1	0	0	1
N...N.......	0.27758	1	0	0	1
N...N...2...	0.16642	1	0	0	1
N...N...=...	-1.04622	1	0	0	1
N...S...C...	0	0	1	0	0
N...[...(...	0.20334	1	2	0	1
N...[...1...	0	0	1	0	0
N...[...=...	0	0	6	0	0
N...[...N...	0	0	1	0	0
N...\...(...	0.49126	1	0	0	1
N...c...1...	0.51906	6	6	0	1
O...(...(...	0.03093	2	3	2	0.0104
O...(.......	0.30226	38	37	13	0.0014
O...(.../...	-0.79437	1	1	0	1
O...(...3...	0.39159	1	0	0	1
O...(...C...	-0.90664	20	17	10	0.0024
O...(...N...	0.34472	4	1	0	1
O...(...O...	0.47693	8	6	2	0.0041
O...-.......	-0.42094	2	8	0	1
O...........	-0.63382	58	55	21	0.0009
O.../.......	0	0	1	0	0
O.../...1...	0	0	1	0	0
O...1...(...	0.27766	1	0	0	1
O...1.......	1.22828	9	13	2	0.0049
O...1...C...	0.16205	1	1	0	1
O...2.......	-0.09263	3	2	0	1
O...3...(...	-0.61822	1	0	0	1
O...3.......	-0.69509	1	0	0	1
O...5.......	2.23007	1	0	0	1
O...=...(...	-0.68177	21	23	7	0.0017
O...=.......	0.25145	45	44	17	0.0005
O...=...1...	-0.11904	6	0	4	0.0056
O...=...C...	0.38122	25	20	7	0.0032
O...=...N...	0.37497	1	2	0	1
O...C...(...	0.17809	8	7	0	1
O...C.......	0.34126	26	26	7	0.0035
O...C...1...	-0.10087	5	1	3	0.0044
O...C...2...	-0.16949	1	0	0	1
O...C...3...	2.22002	1	0	0	1
O...C...C...	2.35523	10	10	2	0.0057
O...C...O...	0.12441	1	0	0	1
O...S...(...	0	0	1	0	0
O...[...(...	0.40351	1	8	0	1
O...\...C...	0.1831	1	0	0	1
O...\...N...	0.21457	1	0	0	1
O...c...1...	0.37497	8	8	1	0.0083
O...c...2...	0.12134	4	1	0	1
O...c...4...	0.1365	1	0	0	1
S...(.......	0.40827	4	4	1	0.0041
S...(...=...	0.30415	2	3	1	0.0024
S...(...C...	0.2608	1	0	0	1
S...(...N...	0	0	1	0	0
S...(...S...	0	0	1	0	0
S...........	0.08016	4	6	1	0.0041
S...1.......	0.21593	1	0	0	1
S...3.......	0	0	1	0	0
S...3...C...	0	0	1	0	0
S...=...(...	0	0	1	0	0
S...=.......	0.4402	3	1	1	0.0017
S...=...C...	-1.09635	1	0	0	1
S...=...O...	0.04897	2	0	1	0.0024
S...C...(...	0	0	1	0	0
S...C.......	0	0	5	0	0
S...C...2...	0	0	1	0	0
S...C...=...	0	0	1	0	0
S...N.......	0	0	1	0	0
S...N...1...	0	0	1	0	0
S...O.......	0	0	1	0	0
S...S...(...	0	0	1	0	0
S...S.......	0	0	1	0	0
S...S...C...	0	0	1	0	0
Nmax.0......	0.13943	50	51	26	0.0028
Nmax.1......	0.00868	11	8	3	0.0034
Nmax.2......	0.30184	6	9	0	1
Nmax.3......	0.19572	4	3	0	1
Nmax.5......	0	0	1	0	0
Nmax.6......	0.29552	1	0	0	1
Nmax.8......	0.51792	1	0	0	1
Omax.0......	0.19637	15	17	8	0.0031
Omax.1......	-0.05678	19	13	10	0.0029
Omax.2......	0.12972	24	28	9	0.0006
Omax.3......	1.24835	8	6	1	0.0083
Omax.4......	0.35958	3	5	1	0.0017
Omax.5......	-1.00238	2	3	0	1
Omax.8......	0.3044	2	0	0	1
Smax.0......	0.04246	69	66	28	0.0002
Smax.1......	0.24864	4	5	1	0.0041
Smax.4......	0	0	1	0	0
[...(.......	0.41408	3	8	4	0.0138
[...(...=...	0.4801	2	4	0	1
[...(...C...	0.02	1	0	4	0.0248
[...(...Cl..	0	0	1	0	0
[...(...N...	0.05649	1	1	0	1
[...(...O...	0	0	2	0	0
[...(...[...	0.49221	1	7	0	1
[...+.......	-0.89634	2	8	0	1
[...+...N...	2.26537	2	8	0	1
[...-.......	1.4141	2	8	0	1
[...-...O...	-0.25095	2	8	0	1
[...........	0.36286	3	8	4	0.0138
[...1.......	0	0	1	1	0
[...1...2...	0	0	0	1	0
[...1...C...	0	0	0	1	0
[...2.......	0	0	0	2	0
[...2...3...	0	0	0	1	0
[...2...C...	0	0	0	1	0
[...2...[...	0	0	0	1	0
[...3.......	0	0	0	1	0
[...3...C...	0	0	0	1	0
[...=.......	0	0	6	0	0
[...=...O...	0	0	6	0	0
[...@.......	0	0	0	2	0
[...@...C...	0	0	0	2	0
[...@@......	0	0	0	1	0
[...@@..C...	0	0	0	1	0
[...C.......	0.2293	1	0	4	0.0248
[...C...1...	0	0	0	1	0
[...C...3...	0	0	0	1	0
[...C...@...	-0.73904	1	0	4	0.0248
[...C...@@..	0	0	0	2	0
[...C...C...	0.46316	1	0	4	0.0248
[...H.......	0.4555	1	0	4	0.0248
[...H...@...	0.09456	1	0	4	0.0248
[...H...@@..	0	0	0	1	0
[...N...(...	0	0	1	0	0
[...N...+...	2.3959	2	8	0	1
[...N.......	0.1368	2	8	0	1
[...O...-...	0.49985	2	8	0	1
[...O.......	-0.88398	2	8	0	1
[...[...-...	0.00832	1	0	0	1
[...[.......	0.95461	1	0	0	1
[...[...N...	0.44829	1	0	0	1
\...(.......	-0.83034	5	3	3	0.0044
\...(...C...	0.26184	3	3	3	0.0104
\...(...O...	0.27374	1	0	0	1
\...........	0.09197	11	7	6	0.0033
\...C...(...	-0.51025	1	0	4	0.0248
\...C.......	0.38655	8	7	6	0.007
\...C...=...	-0.1806	7	5	5	0.0064
\...C...C...	0.29535	4	5	4	0.0104
\...C...O...	0	0	1	1	0
\...N.......	0.00551	3	0	0	1
\...N...=...	0.89156	3	0	0	1
\...O...(...	0.65297	1	0	0	1
\...O.......	0.40236	2	0	0	1
\...O...C...	0.04706	1	0	0	1
\...c...1...	0	0	1	1	0
\...c...2...	1.99168	1	0	0	1
c...(...(...	0.29278	1	1	0	1
c...(.......	0.30839	26	34	5	0.0059
c...(.../...	-0.2224	1	1	0	1
c...(...1...	0.06904	4	3	0	1
c...(...2...	0.45523	1	0	0	1
c...(...3...	0.31564	2	0	0	1
c...(...C...	0.17731	11	13	4	0.0009
c...(...F...	0	0	1	0	0
c...(...Br..	-0.05521	1	1	0	1
c...(...Cl..	1.2905	1	5	0	1
c...(...N...	2.07405	3	6	0	1
c...(...O...	0.48142	12	15	2	0.0068
c...(...S...	-0.46459	1	0	0	1
c...(...[...	0	0	6	0	0
c...(...\...	0.38723	1	0	0	1
c...(...c...	0.27385	8	9	0	1
c...........	0.01166	35	44	7	0.0057
c.../.......	0.03311	6	3	1	0.0068
c.../...C...	-0.65472	5	3	1	0.0057
c.../...N...	-0.1453	1	0	0	1
c...1...(...	-0.60485	7	4	1	0.0077
c...1.......	0.28076	32	44	7	0.0051
c...1...2...	0.27621	1	1	0	1
c...1...C...	0.45705	2	2	1	0.0024
c...1...Cl..	0	0	3	0	0
c...1...N...	0.27185	2	3	1	0.0024
c...1...O...	2.17863	6	10	2	0.0017
c...1...[...	0	0	1	0	0
c...1...c...	0.46588	32	42	7	0.0051
c...2...(...	0.49932	2	1	0	1
c...2.......	0.46454	17	8	0	1
c...2.../...	0.04143	1	0	0	1
c...2...3...	0.02471	1	2	0	1
c...2...C...	-0.94901	2	0	0	1
c...2...Cl..	0	0	1	0	0
c...2...N...	-0.75594	1	0	0	1
c...2...O...	1.60068	3	1	0	1
c...2...c...	0.12555	16	8	0	1
c...3...(...	0	0	1	0	0
c...3.......	0	0	4	0	0
c...3...c...	0	0	4	0	0
c...4.......	0.05974	2	4	0	1
c...4...5...	0	0	1	0	0
c...4...c...	0.44896	2	3	0	1
c...5.......	0.61034	1	1	0	1
c...5...O...	0.11041	1	0	0	1
c...5...c...	0.2134	1	1	0	1
c...C...(...	-0.08507	1	1	0	1
c...C.......	0.44205	5	9	2	0.0001
c...C...=...	0.31085	1	1	0	1
c...C...C...	0.62336	1	1	0	1
c...C...Br..	0	0	1	0	0
c...C...Cl..	0	0	1	0	0
c...C...O...	2.26055	1	1	0	1
c...Cl......	0	0	5	1	0
c...N...(...	1.15966	1	0	0	1
c...N.......	-0.39366	6	6	0	1
c...N...=...	0	0	1	0	0
c...O...(...	0.22276	2	0	0	1
c...O.......	0.18452	12	9	1	0.01
c...O...5...	-0.78865	1	0	0	1
c...O...C...	-0.786	4	2	0	1
c...\.......	2.36347	1	1	1	0.0104
c...\...C...	0	0	1	1	0
c...\...N...	0.55571	1	0	0	1
c...c...(...	0.1507	21	23	4	0.006
c...c.......	-0.02964	35	41	7	0.0057
c...c...1...	-0.06805	31	41	6	0.0059
c...c...2...	0.02579	16	8	0	1
c...c...3...	0	0	4	0	0
c...c...4...	2.39068	2	4	0	1
c...c...5...	0.08288	1	1	0	1
c...c...c...	0.09897	32	35	6	0.0061
c...n...(...	0	0	1	0	0
c...n...1...	0	0	1	0	0
c...n...c...	0	0	2	0	0
n...(.......	0	0	2	0	0
n...(...3...	0	0	1	0	0
n...(...Cl..	0	0	1	0	0
n...........	0	0	3	0	0
n...1.......	0	0	1	0	0
n...1...c...	0	0	1	0	0
n...4.......	0	0	1	0	0
n...4...c...	0	0	1	0	0
n...c...(...	0	0	1	0	0
n...c.......	0	0	3	0	0
n...c...4...	0	0	1	0	0
n...c...c...	0	0	2	0	0

## Sheet: Table S4
Split	Set	Split 1	Split 2	Split 3	Split 4	Split 5
1	Training	100	42.5	63	44.4	46.3
	Invisible training	100	45.8	55.6	52.4	50.7
	Calibration	100	16.7	13.6	24.1	16.7
	Validation	100	17.2	23.7	29.5	40.7
2	Training		100	32.9	36.1	35.4
	Invisible training		100	36.1	45.5	36.6
	Calibration		100	16.4	16.7	32.3
	Validation		100	14	23.7	31.6
3	Training			100	40.3	42.2
	Invisible training			100	38.6	38
	Calibration			100	23.7	19.7
	Validation			100	16.7	24.1
4	Training				100	41.4
	Invisible training				100	40.6
	Calibration				100	20
	Validation				100	30
5	Training					100
	Invisible training					100
	Calibration					100
	Validation					100
